# Supplementary material
Source: PubMed Central journal article supplement (PMC3241808)
Supplement: 1109926108_pnas.201109926SI.pdf [file 1109926108_pnas.201109926SI.pdf]

# Supporting Information

Barca-Mayo et al. 10.1073/pnas.1109926108

Table S1. Primers used in this study

| Gene          | Forward primer               | Reverse primer                  |
|---------------|------------------------------|---------------------------------|
| RPII          | 5'-GCACCACGTCCAATGACAT-3'    | 5'-GTGCGGCTGCTTCATAA-3'         |
| D1            | 5'-GATGGCCAGGAACCCCGATT-3'   | 5'-AATGAAGGTCAGGTCGAACTGCCAA-3' |
| D2            | 5'-GTTGCTTCTGAGCCGCTC-3'     | 5'-GCTCTGCACTGGCAAAGTC-3'       |
| D3            | 5'-CCGACCTGATGGCTTCCA-3'     | 5'-CGGCCATGAACGGTGGTCA-3'       |
| IL-1 $\beta$  | 5'-GCTGAAAGCTCTCCACCTCAA-3'  | 5'-TCGTTGCTTGTTCTCCTTGTA-3'     |
| TNF- $\alpha$ | 5'-CTGTAGCCACGTGTCAGTCAA-3'  | 5'-CTCCTGGTATGAGATAGCAAATCG-3'  |
| Cxcl-1        | 5'-TGAGCTGCGCTGTCAGTGCCT-3'  | 5'-AGAAGCCAGCGTTCACCAGA-3'      |
| Cxcl-2        | 5'-GCTGGCCACCAACCACCAGG-3'   | 5'-AGCGAGGCACATCAGGTACG-3'      |
| IL-6          | 5'-ACGGCCTTCCTACTTCACA-3'    | 5'-TCCAGAAGACCAGAGGAAATTTT-3'   |
| Serpina 3G    | 5'-CTTCCCAACGGCTGGAATCTA-3'  | 5'-ACTGTCCAATCAGGCATAGCG-3'     |
| Mmp9          | 5'-CTGGACAGCCAGACACTAAAG-3'  | 5'-CTCGGGCAAGTCTTCAGAG-3'       |
| Hsp1          | 5'-AGTTTCTTCCGCTCTTTGACAG-3' | 5'-TGCCACCTTTGGTTACAGTTTC-3'    |
| Reltny        | 5'-CTTGCCAATCGAGATGACTGT-3'  | 5'-GTCTGCCTGAAGCCGTGATAC-3'     |

Cxcl-1, chemokine (C-X-C motif) ligand 1; Cxcl-2, chemokine (C-X-C motif) ligand 2; D1, type 1 deiodinase; D2, type 2 deiodinase; D3, type 3 deiodinase; Hsp1, Heat-shock protein 1; Mmp9, Matrix metalloproteinase 9; Reltny, Resistin-like  $\gamma$ ; RPII, RNA polymerase II.
